# Supplementary material
Source: PubMed Central journal article supplement (PMC7754193)
Supplement: NIHMS1545905-supplement-1.pdf [file NIHMS1545905-supplement-1.pdf]

## Supplementary Material

| PVT Variable | Beta   | SE   | p-value       | OR          | Lower CI    | Upper CI    |
|--------------|--------|------|---------------|-------------|-------------|-------------|
| 1/RT         | -0.87  | 0.23 | <b>0.0001</b> | <b>0.42</b> | <b>0.27</b> | <b>0.66</b> |
| LAPSE        | 0.077  | 0.03 | <b>0.013</b>  | <b>1.08</b> | <b>1.02</b> | <b>1.15</b> |
| FALSE        | -0.044 | 0.04 | 0.243         | 0.96        | 0.89        | 1.03        |
| FAST         | -0.67  | 0.21 | <b>0.0016</b> | <b>0.51</b> | <b>0.34</b> | <b>0.77</b> |
| SLOW         | -0.72  | 0.21 | <b>0.0007</b> | <b>0.49</b> | <b>0.32</b> | <b>0.73</b> |
| SLOPE        | 0.86   | 2.63 | 0.744         | 2.36        | 0.01        | 409.44      |

**Table S1.** Cross-sectional associations between PVT variables of interest and outcome of depression among 942 individual WSC participants using only their initial PVT visit (942 PVT observations averaged morning and afternoon time points). Adjusted for age, sex, BMI, sedative-hypnotic medications, chronic conditions, alcohol, caffeine, AHI, smoking, and antidepressant medications. SE=standard error; OR=odds ratio; CI=95% confidence interval. Significant associations marked in bold.

| PVT Variable | Beta  | SE   | p-value           | OR          | Lower CI    | Upper CI    |
|--------------|-------|------|-------------------|-------------|-------------|-------------|
| 1/RT         | -1.20 | 0.23 | <b>&lt;0.0001</b> | <b>0.30</b> | <b>0.19</b> | <b>0.47</b> |
| LAPSE        | 0.133 | 0.03 | <b>&lt;0.0001</b> | <b>1.14</b> | <b>1.08</b> | <b>1.21</b> |
| FALSE        | -0.03 | 0.03 | 0.379             | 0.97        | 0.92        | 1.03        |
| FAST         | -0.95 | 0.23 | <b>&lt;0.0001</b> | <b>0.39</b> | <b>0.25</b> | <b>0.61</b> |
| SLOW         | -0.99 | 0.22 | <b>&lt;0.0001</b> | <b>0.37</b> | <b>0.24</b> | <b>0.57</b> |
| SLOPE        | -1.97 | 2.91 | 0.498             | 0.14        | 0.01        | 41.83       |

**Table S2.** Cross-sectional associations between PVT variables of interest and outcome of depression among 942 individual WSC participants using only their last PVT visit (942 PVT observations averaged morning and afternoon time points). Adjusted for age, sex, BMI, sedative-hypnotic medications, chronic conditions, alcohol, caffeine, AHI, smoking, and antidepressant medications. SE=standard error; OR=odds ratio; CI=95% confidence interval. Significant associations marked in bold.

| PVT Variable | Beta  | SE   | p-value           | OR          | Lower CI    | Upper CI    |
|--------------|-------|------|-------------------|-------------|-------------|-------------|
| 1/RT         | -0.96 | 0.19 | <b>&lt;0.0001</b> | <b>0.38</b> | <b>0.26</b> | <b>0.56</b> |
| LAPSE        | 0.07  | 0.02 | <b>0.0003</b>     | <b>1.07</b> | <b>1.03</b> | <b>1.12</b> |
| FALSE        | -0.02 | 0.03 | 0.460             | 0.98        | 0.92        | 1.04        |
| FAST         | -0.76 | 0.19 | <b>&lt;0.0001</b> | <b>0.47</b> | <b>0.32</b> | <b>0.68</b> |
| SLOW         | -0.71 | 0.16 | <b>&lt;0.0001</b> | <b>0.49</b> | <b>0.36</b> | <b>0.67</b> |
| SLOPE        | -0.28 | 1.67 | 0.868             | 0.76        | 0.03        | 19.95       |

**Table S3.** Cross-sectional associations between PVT variables of interest and outcome of depression using only morning 10-minute PVT collection using repeated measures logistic regression. Adjusted for age, sex, BMI, sedative-hypnotic medications, chronic conditions, alcohol, caffeine, AHI, smoking, and antidepressant medications. SE=standard error; OR=odds ratio; CI=95% confidence interval. Significant associations marked in bold.

| PVT Variable | Beta  | SE   | p-value | OR          | Lower CI    | Upper CI    |
|--------------|-------|------|---------|-------------|-------------|-------------|
| 1/RT         | -1.01 | 0.18 | <0.0001 | <b>0.36</b> | <b>0.26</b> | <b>0.52</b> |
| LAPSE        | 0.09  | 0.02 | <0.0001 | <b>1.09</b> | <b>1.05</b> | <b>1.14</b> |
| FALSE        | -0.01 | 0.02 | 0.568   | 0.99        | 0.95        | 1.03        |
| FAST         | -0.73 | 0.18 | <0.0001 | <b>0.48</b> | <b>0.34</b> | <b>0.69</b> |
| SLOW         | -0.80 | 0.15 | <0.0001 | <b>0.45</b> | <b>0.33</b> | <b>0.60</b> |
| SLOPE        | -0.44 | 1.75 | 0.804   | 0.64        | 0.02        | 19.89       |

**Table S4.** Cross-sectional associations between PVT variables of interest and outcome of depression using only afternoon 10-minute PVT collection using repeated measures logistic regression. Adjusted for age, sex, BMI, sedative-hypnotic medications, chronic conditions, alcohol, caffeine, AHI, smoking, and antidepressant medications. SE=standard error; OR=odds ratio; CI=95% confidence interval. Significant associations marked in bold.
